# Supplementary material for: Impact of convection on the upper-tropospheric composition (water vapor/ozone) over a subtropical site (Réunion Island, 21.1° S–55.5° E) in the Indian Ocean
Source: Copernicus journal article supplement (doi:10.5194/acp-2020-2), 2020-02-18
Supplement: Supplementary file [file acp-2020-2-AC1-supplement.zip]

### Anonymous Referee #1:

We appreciate the thoughtful and constructive comments from the reviewers. Their helpful suggestions and attention to detail have made this a substantially better paper, and we greatly appreciate the time they put into the manuscript.

Please see below our responses (in bold) to the individual detailed comments. Numerous figures are shown in our response to illustrate our points but some are not included in the revised manuscript.

We have addressed all the reviewers' comments and modified the manuscript and figures accordingly.

### Major comments:

My main concern in this study is the handling of RH observations itself and with respect to clouds. Cirrus clouds is the prevailing cloud type in the altitude range used in this study. These clouds are often found in the outflow of convective systems (e.g. Fierli et al, 2008) but they occur also due to other dynamical situations like warm or cold fronts, gravity waves etc. which produces also a slow to moderate uplift of air (see Kraemer et al, 2016). Clouds are always an indication of uplifted moisture, but they also redistribute water vapor to lower altitudes due to sedimentation of ice particles. Therefore, they can also partly weaken the hydration signatures in your observations.

In the whole study, all humidity measurements are shown as relative humidity with respect to water (I guess) which is the standard output of meteorological radiosondes. In the used altitude region (10-13 km) relative humidity with respect to ice would be the better quantity to identify cirrus clouds. For example, on page 5 (lines 161-166) the 60% RH (with respect to water) corresponds to 100% RH with respect to ice (RHi) at assumed temperature of 220K (higher RHi with even lower temperatures). RHi values around 100% are an indication for clouds. And I think there are a lot of cloudy profiles in the measurements, as you can see for example in Figure 3 or 4.

The radiosonde measurements presented in the first version of the manuscript correspond to relative humidity with respect to water (RH). For temperatures below 0°C, we have computed the RH with respect to ice (RHi) using the formula of Hyland and Wexler (1983) for saturation vapor pressure over ice. Figures 3 and 4 have been modified accordingly. Section 2.1 in the revised manuscript has been corrected.

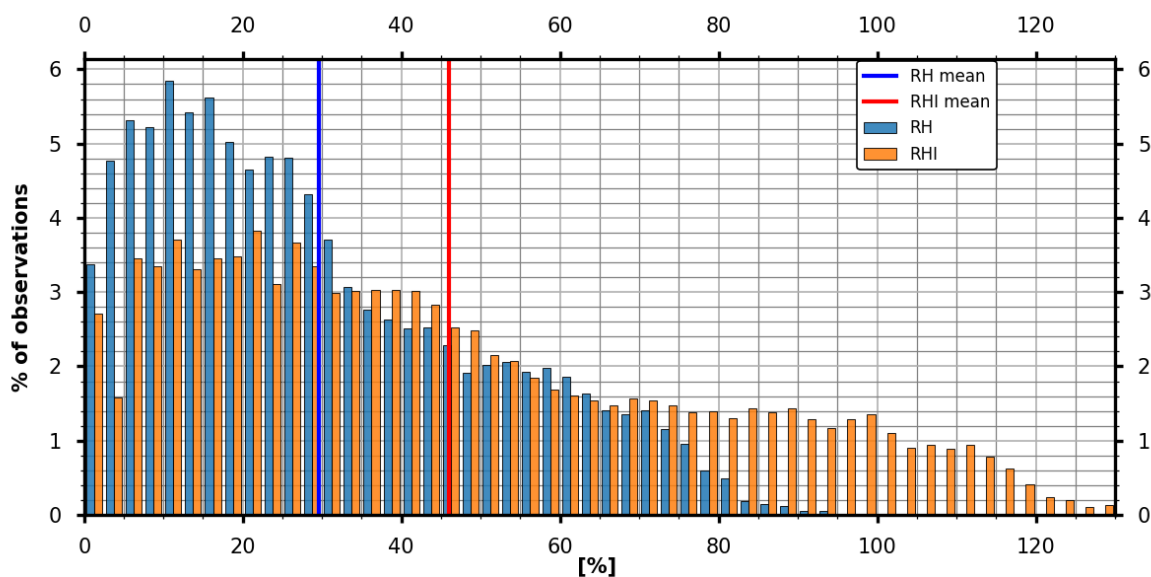

***Figure 1: Distribution of RH with respect to water (RH, blue) and RH with respect to ice (RHi, orange) in the upper troposphere (10-13km) above Réunion Island. 904 profiles for the period Nov 2013-Apr 2016 have been used to compute the distribution. Bins are every 5%. The blue thick line indicates the mean RH (30%) and the red thick line indicates the RHi mean (46.5%).***

Figure 1 above compares RH and RHi distributions between 10 and 13 km for the period Nov 2013-Apr 2016. As you suggested, there is a significant number of profiles with RHi above 80% (20% of the profiles) and above 100% (8.7 % of the profiles). We agree that RHi values  $\geq 100\%$  could be an indication of the presence of clouds. However additional remote-sensing instruments (e.g. Lidar/Radar) would be needed in addition to the radiosonde measurements of RH to truly assess the presence of these clouds. Unfortunately, the daily Météo-

France and weekly SHADOZ radiosondes are performed at the airport (Gillot Station, in the north of the island) where no remote sensing instruments are installed.

Figure 2 shows the daily evolution of mean upper-tropospheric (10-13km) RH (with respect to water) from September 2013 to July 2016. On Figure 2 the RH values are color-coded according to the RHi (top) and the water vapor mixing ratio (bottom) values. The different RHi/WV ranges used in Figure 2 correspond to our definition of dry profiles (in blue), wet profiles (orange) and supersaturated profiles (red). To distinguish the effect of temperature and water vapor on RH/RHi values, we computed the water vapor mixing ratio (WV) for each profile between September 2013 to July 2016. We found a mean 10-13km WV of 121ppmv over this period. Note that we compared this value with a climatological WV value using Microwave Limb Sounder (MLS) v4.2 water vapor data for 2005-2017. We computed a MLS climatological WV profile for a region of  $5^{\circ}\times 5^{\circ}$  surrounding Réunion Island. The MLS climatological WV profile at 261 hPa (~10km) is 116 ppmv and this agrees with the mean upper-tropospheric value of 121 ppmv inferred from the radiosonde data.

The top panel on Figure 2 shows that 91% of profiles with  $RH > 50\%$  are associated with high  $RHi > 80\%$ . These events have also a high WV (lower panel of Figure 2) and indicate a hydration rather than a cooling effect on the high RH/RHi values. Some hydrated profiles ( $RH > 50\%$ , 9% of the profiles) with a low  $RHi (< 80\%)$  are present in January 2016 and this could be linked to a cooling of the upper troposphere. 27% of the hydrated profiles ( $RH > 50\%$ ) correspond to supersaturated  $RHi$  ( $RHi > 100\%$ ) and occur mostly in 2015 and 2016. The RH values associated with  $RHi > 100\%$  in 2015 are spread throughout the summer months. They correspond to air masses detrained from tropical cyclones (Bejisa in January 2015 and Haliba in March 2015) or have high resident time in the middle troposphere (RTMT 5-10km on Figures 3 & 10 of the revised manuscript). In 2016, the ice saturated profiles are almost all between February and March. They are associated with a high RTMT (RTMT on Figure 3).

A discussion was added in section 3.1 in the revised manuscript. As the distinction between high  $RHi (> 80\%)$  and low  $RHi (< 80\%)$  is similar to the distinction between hydrated profiles ( $RH > 50\%$ ) and dry profiles ( $RH < 50\%$ ), we choose to keep and show RH (with respect to water) measurement to study convective effects on the hydration of the upper troposphere above Réunion Island.

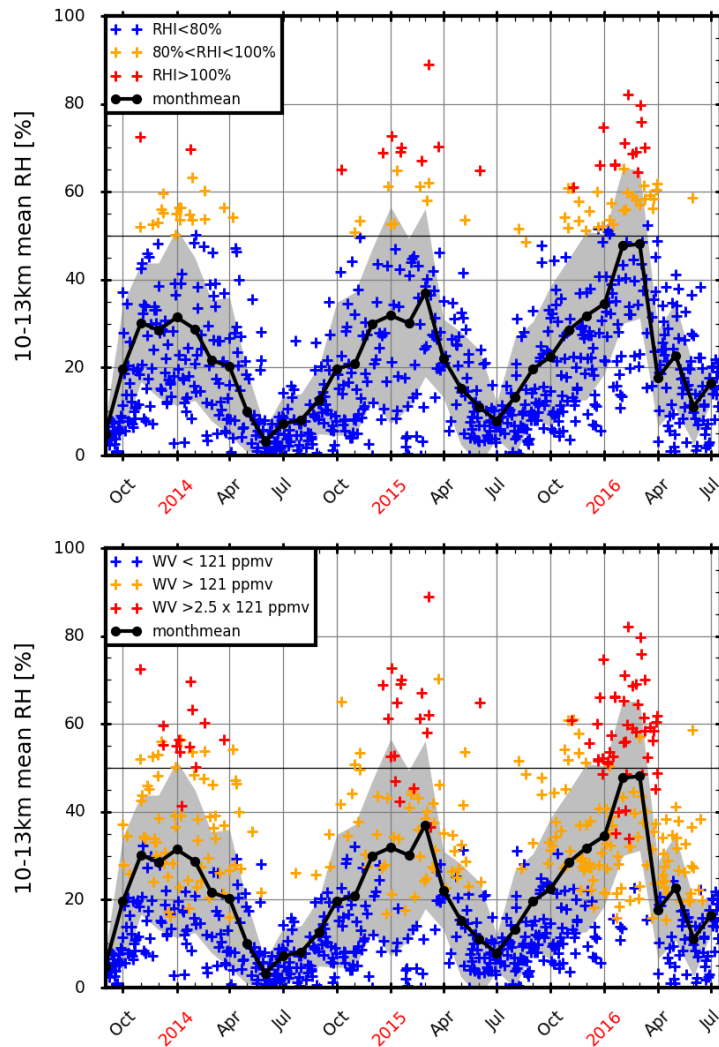

**Figure 2: Top, daily evolution of mean upper tropospheric (10 to 13 km) RH for the period September 2013 to July 2016. The RH (with respect to water) values are color coded according to the values of RHi. In blue RH values for  $RHi < 80\%$ , in orange RH values for  $80\% < RHi < 100\%$ , and in red RH values for  $RHi > 100\%$ . Bottom, daily evolution of mean upper tropospheric (10 to 13 km) RH for the period September 2013 to July 2016. The RH (with respect to water) values are color coded according to the values of water vapor mixing ratios (WV). The mean 10-13km WV is 121 ppmv. In blue RH values for  $WV < 121$  ppmv, in orange RH values for  $121 \text{ ppmv} < WV < 2.5 \times 121$  ppmv and in red RH values for  $WV > 2.5 \times 121$  ppmv. On the two panels, the black thick line corresponds to the monthly mean RH in the upper-troposphere.**

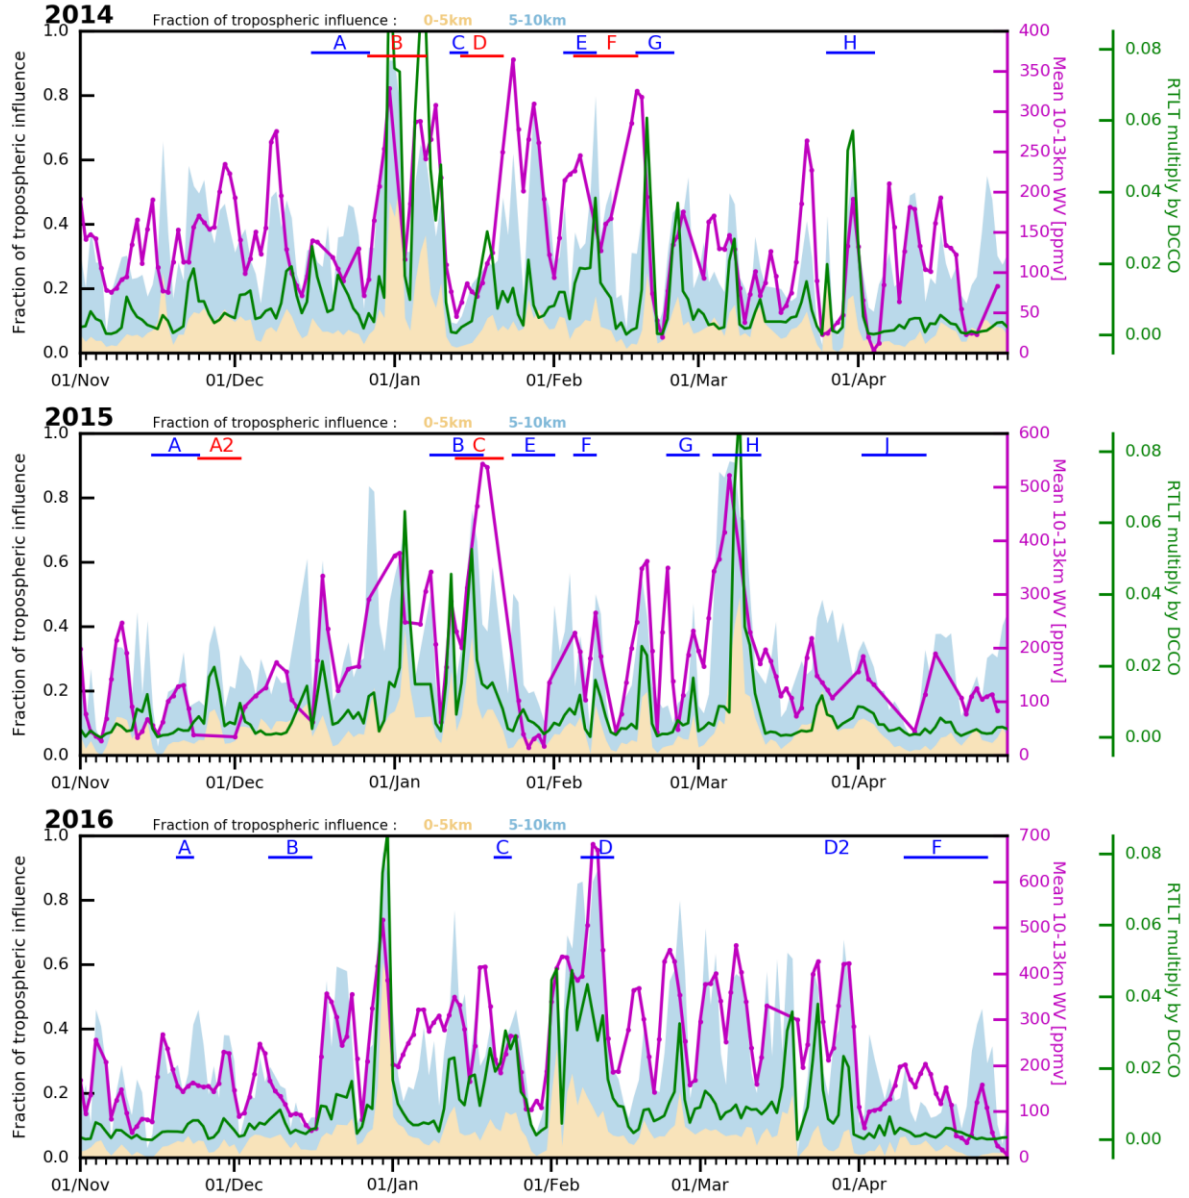

**Figure 3: Top panel, Time-evolution of fraction of tropospheric influence (spatially summed) for the low troposphere (0-5km, sRTL) in orange and the middle troposphere (5-10km, RTMT) in blue. The product of DCCO by RTLT in green line and mean upper-tropospheric (10-13km) water vapor mixing ratio in purple for austral summer 2014. Middle and bottom panels: Same as top panel for austral summers 2015 and 2016 respectively. The letters in red and blue indicate periods with different tropical cyclones for each austral summer as shown on Figure 9 of the manuscript.**

Figure 5 shows the distribution with all RH measurements between 10 and 13 Kilometers. The measurements between RH of 50 to 60% which corresponds approximately to 90-100% RH<sub>i</sub> are most likely in cloud observations of cirrus. This could be discernible by a small increase in the number of observations between 50 to 60%. Since, the most frequent RH<sub>i</sub> is expected to be around 100% RH<sub>i</sub> due to thermodynamic reasons (see Kraemer et al, 2016). Another example is visible in Figure 4 where a RH of 90% (April 2015) is shown, which would correspond to RH<sub>i</sub> of 136-167% for temperatures of 230-200K.

As shown on the top panel of Figure 2, 96% of profiles with high RH<sub>i</sub> (>80%) correspond to RH >50%. There was only one case in 2016 with a high RH<sub>i</sub> and a RH of 45%. We agree that these high values could correspond to cirrus clouds in the upper troposphere. However, it is difficult to assess the presence of such clouds based on

**RHi values only. Additional remote sensing data (e.g. Lidar/Cloud Radar) would be required but are not available for the Gillot Station where the radiosonde launches are performed. A comment has been added in section 3.1 of the revised manuscript.**

**The RH value of 87% on 7 March 2015 corresponds to a RHi of 137%. This high value is linked with the passage of tropical storm Haliba (March 7-10) near Réunion Island.**

If there is a significant amount of cloudy profiles within your measurements, I'm sure that there is also a part of it not generated by convection and formed by other uplifting processes (examples see above). These uplifting processes just transport air masses more from the middle troposphere into the upper troposphere and not from the boundary layer. This can be also seen by Figure 10. There are a lot of signatures in the mean relative humidity where no indicator either sRTLTL or the product of RTLTL and DCCO create a coincident signature. This could also partly explain the higher ozone concentration found in moist profiles in the upper troposphere compared to other studies, because the air is just originating from higher altitudes above the boundary layer with a higher ozone concentration.

**We have computed the resident time in middle troposphere (RTMT, 5-10km) in addition to the resident time in the low troposphere (RTLTL, 0-5km) using the FLEXPART backtrajectories. The evolution of RTMT is shown in blue on Figure 3. In addition, we have added the evolution of the mean upper-tropospheric water vapor mixing ratio (purple line) instead of the mean upper-tropospheric RH (to distinguish between hydration versus cooling effect by uplift). The sum of RTLTL and RTMT corresponds to the total residence time in the troposphere from 0 to 10km.**

**On Figure 3, a high correlation can be seen between the sum of RTLTL and RTMT and mean upper-tropospheric WV variations. Therefore, hydration effect (mostly from convection) dominates over cooling effect due to uplift from the low/middle troposphere. The high correlation between RTLTL+RTMT and the mean upper-tropospheric WV indicates that water vapor transport occurred either from the low troposphere (probably by deep convection) or from the middle troposphere. The transport of water vapor from the middle-troposphere could be due large-scale uplift of air masses as you suggested.**

**An analysis on the correlations between WV mixing ratio and residence time calculated by FLEXPART at different altitude range in the troposphere is shown on figure 4 below. The first row shows the correlation between WV and RTLTL (0-5km, left) or the product of RTLTLxDCCO (right). According to the correlation calculations, 23% to 27% of the WV variability is explained by RTLTL or RTLTLxDCCO. As you mentioned, different phenomena can influence the upper tropospheric water vapor variability, such as deep convection, gravity waves or large-scale uplift of air masses. The low value of the  $R^2$  coefficient is therefore difficult to interpret.**

**The second row on Figure 4 shows the correlation between WV mixing ratio and the rate of residence time in the middle troposphere (RTMT) between 5-10km altitude. The R-squared coefficient between RTMT and WV is 42%. The study of Schumacher et al. (2015) has shown that stratiform clouds have a vertical speed up to 10  $\text{m s}^{-1}$  below 7km in altitude and then a slow ascent ( $< 0.5 \text{ m s}^{-1}$ ) up to 10km. It suggests that a higher correlation between WV and RTMT than between WV and RTLTL can be expected for these kinds of clouds.**

**To conclude, the RTLTLxDCCO product can represent only the influence of deep convective clouds, while higher R-squared coefficient with RTMT with WV shows that stratiform clouds can contribute to enhance the WV mixing ratio in the 10-13km range. Therefore the correlation (R-squared of 42%) between the sum of (RTLTL+RTMT)xDCCO and the mean upper-tropospheric WV indicates water vapor transport associated with convection; either from the low troposphere by deep convective clouds or from the middle troposphere by stratiform clouds.**

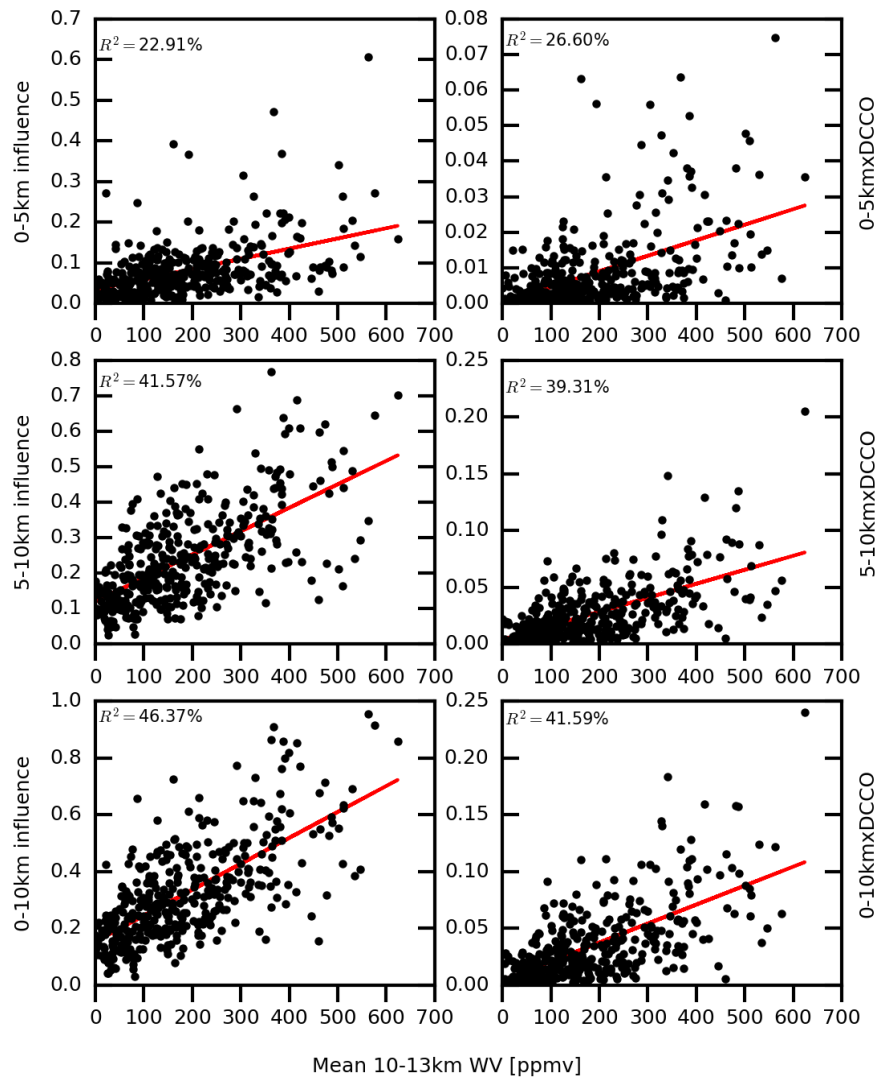

**Figure 4: Correlations between mean upper-tropospheric water vapor mixing ratio (WV), residence times in the troposphere (0-5km RLT, 5-10km RTMT and 0-10km RLT+RTMT) and tropospheric residence times multiplied by DCCO. Backtrajectories over one-week were computed with the FLEXPART Lagrangian model.**

Another point is the usage of relative humidity. The RH as well as RH<sub>i</sub> depends beside water vapor also strongly on temperature. If you see an increase in relative humidity it can also be due to a temperature decrease. Therefore, I suggest to show in Figure 4, a second panel with the water vapor mixing ratios between 10-13 km instead of RH to confirm that the summertime increase in RH is due to an increase in the water vapor concentration and not only due to a temperature artifact/anomaly.

We propose to add Figure 2 above to the revised manuscript. On this figure, the link between high water vapor mixing ratios and mean-upper tropospheric RH can be seen. The red crosses indicate that the most hydrated profiles (2.5 x the mean upper-tropospheric of 121ppmv over Sept 2013-Mar 2016) are associated with RH>50%. There are few events (~5 profiles) with WV > 302.5 ppmv and a low RH (<50%). They occur mostly in austral summer 2016. These events are not discussed on the paper but could be linked to warmer air from recent convection.

In general, I think it is correct to use RH as an indication of hydration, but at least there must be more discussion about the usage of RH like the dependence on temperature. I still agree with the main message of the study. However, I think that the humidity measurements must be discussed in a more balanced way including also a short discussion about the effect of clouds also in combination with Figure 10.

**As discussed above, there is a high correlation with high RHi/RH values and mean upper-tropospheric water vapor mixing ratio. Therefore, we choose to keep RH (with respect to water) measurements to study convective effects on the hydration of the upper troposphere above Réunion Island. We did show some RHi values on Figures 3&8 of the revised manuscript.**

#### **Specific comments/questions:**

- Page 1, line 31: Maybe add here Riese et al. 2012. They showed nicely how changes in ozone and water vapor due to mixing processes change the radiative budget of the UTLS region.

**The reference has been added.**

- Page 2, line 48: "Marine boundary layer to the upper troposphere (Jorge ozone chemical lifetime is on the order of 50 days)". Can you please specify where you have the information from and for which altitude the stated lifetime of ozone is valid. Usually you have a strong increase of ozone lifetime with altitude in the troposphere.

**The reference is at the end of the sentence, the study of Folkins et al. (2002) has shown this result.**

- Page 3, lines 81-82: It would be consistent and also helpful to also report about precision and uncertainties of radiosonde measurements of the Meteomodem M10 sonde. In particular, the uncertainties of the humidity sensor would be helpful for the interpretation of the measurements.

**We compared the M10 measurements of RH (with respect to water) with Cryogenic Frospoint Hygrometer (CFH) water vapor sondes at the Maïdo Observatory (21.08°S, 55.38°E on the west coast of the island, 20 km away from the airport). Balloon-borne measurements of water vapor and temperature started in 2014 at the Maïdo Observatory on a campaign basis within the framework of the Global Climate Observing System (GCOS) Reference Upper-Air Network (GRUAN) network (Bodeker et al., 2015). The balloon sonde payload consists of the CFH and the Internet iMet-1-RSB radiosonde for data transmission. The iMet-1-RSB radiosonde provides measurements of pressure, temperature, Relative Humidity (RH) and wind data (speed and direction from which zonal and meridional winds are derived). The CFH was developed to provide highly accurate water vapor measurements in the Tropical Tropopause Layer (TTL) and stratosphere where the water vapor mixing ratios are extremely low (~2 ppmv). CFH mixing ratio measurement uncertainty ranges from 5% in the tropical lower troposphere to less than 10% in the stratosphere (Vömel et al., 2007); a recent study shows that the uncertainty in the stratosphere can be as low as 2-3% (Vömel et al., 2016). The CFH instrument is often launched in tandem with the Modem M10 sonde. The CFH RH data were calculated with the CFH water vapor mixing ratio and the Internet iMet-1-RSB temperature using the water vapor pressure equation by Hyland and Wexler (1983) and interpolated to the same 200-m vertical grid as the M10 data. A total of 17 multiple-payload (CFH+M10) soundings is used for the comparison shown on Figure 5. The RH profiles from the CFH and Modem M10 show good agreement with differences of less than 10% mostly from the surface to the stratosphere. In the lower troposphere, below 5km, the mean RH difference is -1.05%. In the middle (5-10km) and upper troposphere (10-15km) the mean RH differences are 1.5 and 2.2% respectively. Near 15km, the M10 RH shows dry biases with a peak difference of -3.7% at 15.6km (the mean RH at this level ranges from 18.5 for the M10 sonde to 22.2% for the CFH sonde). Figure 5 is not shown in the revised manuscript but we have included some text on the comparison between the M10 and CFH sondes in section 2.1 of the revised manuscript.**



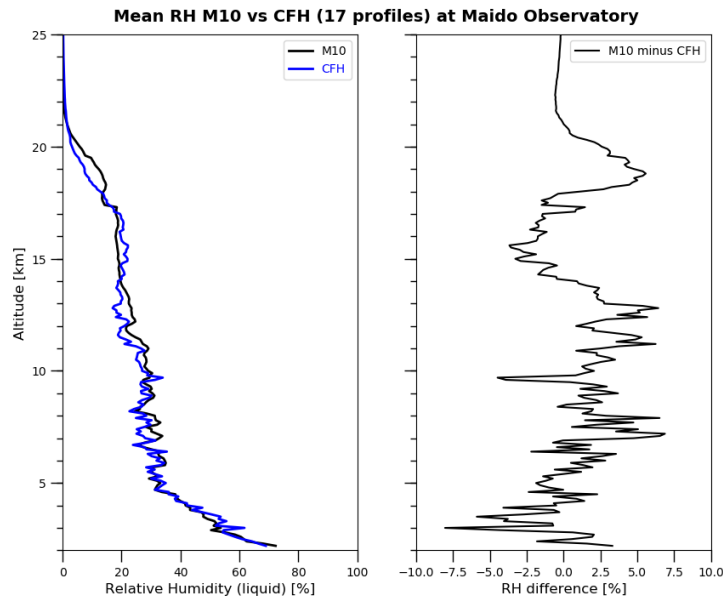

**Figure 5: Vertical profiles of mean RH obtained from 17 multiple-payload sounding of CFH&M10 radiosondes (blue and black curves respectively on the left panel) at the Maïdo Observatory over 5 years (2014-2019). The mean profile of differences in RH is shown on the right panel.**

Page 4, lines 124-126: Can you state something about how frequent you detect the anvil outflow instead of the anvils. Maybe you have a rough estimate. Also, I'm wondering about in situ formed cirrus clouds which are typically colder than 230K. Are they not detected by the Meteosat 7 SEVIRI instrument? If they are detected, they would also strongly distort your statistics of DCCO. Can you please comment on this also?

The infrared channel of the Meteosat Visible and Infra-Red Imager (MVIRI) instrument is centered at  $11.5\mu\text{m}$  (between  $10.5\mu\text{m}$  and  $12.5\mu\text{m}$ ). To our knowledge, there is no study on in situ formed cirrus clouds using the MVIRI instrument. However, Minnis et al. (2008) used the Moderate Resolution Imaging Spectroradiometer (MODIS)  $11\mu\text{m}$  IR channel data and data taken by the Cloud-Aerosol Lidar and Infrared Pathfinder Satellite Observations (CALIPSO) to investigate the difference between cloud-top altitude  $Z_{top}$  and infrared effective radiating height  $Z_{eff}$  for optically thick ice cloud (i.e. deep convective clouds). From the MODIS IR brightness temperature data ( $T_b$ ), they estimated cloud top altitudes by finding the altitude where  $T_b$  is found in an atmospheric temperature sounding. The derived cloud top altitudes were then compared to cloud top altitudes estimated with CALIPSO observations. The difference  $\Delta Z$  between  $Z_{top}$  and  $Z_{eff}$  rises from  $\sim 1.25$  km for  $Z_{eff} = 5$  km to more than 2 km for  $Z_{eff} > 14$  km. This suggests that using a threshold of 230K to define deep convective clouds can induce an error in the selection of these clouds. Thin cirrus clouds could be included in our selection of deep clouds but it is difficult to say how much by using passive satellite sensors only. Additional measurements from active sensors such as CALIPSO would be required to distinguish between the deep convective cores inferred from passive infrared radiances and cold in situ formed cirrus clouds. However, this is beyond the scope of this study.

We did try to assess the sensitivity of the DCCO distribution to different  $T_b$  thresholds. This is shown on Figure 6 below. We used 3 values of  $T_b$ : 220, 230 and 240 K that correspond to cloud top altitudes of 13.5km, 12km and 11km respectively. As shown by Minnis et al. (2008), the cloud top altitude estimated from passive infrared



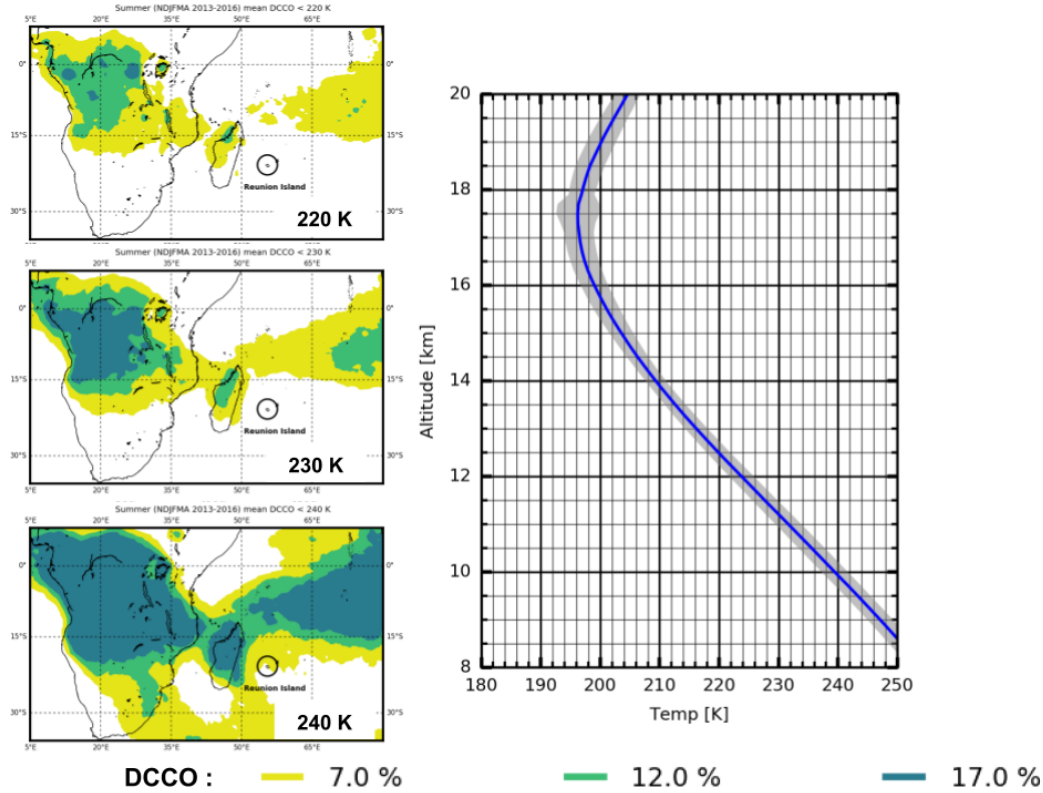

***Figure 6: Average map of the deepest convective cloud occurrence (DCCO) for austral summer conditions (NDJFMA from November 2013 to April 2016) using different brightness temperature thresholds (top left 220K, center left 230K, bottom left 240K). The yellow contour is for DCCO > 7%, the green contour for DCCO > 12% and the dark green contour is for DCCO > 17%. On the right, a temperature profile averaged over Austral Summers 2014, 2015 and 2016 is shown to illustrate the corresponding cloud top altitude.***

radiances are underestimated by 1 to 2km thus we added 1km to the altitude where  $T_b$  is found in the mean temperature profile for austral summer conditions.

The distribution of DCCO using the 220K threshold is more selective and highlight the deeper convective clouds over Africa and the north of Madagascar. This threshold seems to be more adapted to identify deep convective centers associated with convection over land. As the  $T_b$  threshold is increased to 230 and 240K more clouds over the ocean are included in the distribution of DCCO.

Young et al. (2013) have studied MODIS cloud top brightness temperature data in the tropics. They found that the averaged brightness temperature for deep clouds was around 228 K and 236.3K for anvil. Therefore, our definition of DCCO with a  $T_b$  of 230K is a good compromise to distinguish deep convective clouds. Some cirrus clouds may be included in this distribution but it is hard to conclude without active remote sensor data. A comment was added in section 2.2 of the revised manuscript.

Page 4, line 130: What is actually meant by "backtrajectories were calculated every hour at 0.25°resolution...." ? The resolution of the wind field is already mentioned in the text. And can you please also add the vertical resolution in the altitude range of interest. Please also add information about the temporal length of the backward trajectory calculation.

We apologize for the confusion. FLEXPART can provide gridded output of the residence time. We ran backward simulations over 2 weeks and the residence time field was reported on a regular 0.5°x0.50° output grid every 3 hours. The resolution of the gridded output is totally independent from those of the meteorological input. Therefore, we use 0.25°x0.25° operational ECMWF input fields to compute the backward trajectories and the resulting residence time is reported on a regular 0.5°x0.5° output grid. We use input meteorological

fields from the ECMWF Integrated Forecast System (IFS, current ECMWF operational data) that have 137 vertical levels up to 0.01hPa. The vertical resolution varies from ~20 m near the surface, ~100 m in the low troposphere, ~300 m in the middle/upper troposphere and 500 m in the stratosphere. Section 2.3 has been corrected in the revised manuscript.

- Page 4, lines 130-132: Are you sure that the ECMWF forecast data are used for the backward trajectory calculation and not the analysis data? The deviation between forecast and analysis data could be large. The analysis data would better represent the real meteorological fields.

Once again, we apologize for the confusion. Operational data from the ECMWF IFS are used as input data for the FLEXPART simulations. FLEXPART was driven by using operational ECMWF analysis at 00, 06, 12 & 18 UTC and the 3 & 9-hour forecast fields from the 00 and 12 UTC model analysis. Section 2.3 has been corrected in the revised manuscript.

- Page 5, 172-174 in combination with Figure 4: It would be helpful, if you could include the monthly mean as a time series in the plot (e.g. black line). Because Of the strong scatter, it is difficult to see where the mean value of each period would be. With a monthly mean RH climatology in addition to the scatter, it would be easier to see.

The monthly mean value of RH has been added on Figure 2 of the revised manuscript.

Page 6, 192-195 in combination with Figure 5: It would be good to discuss the measurements in the cloud at this point. Especially the increase in the distribution between 50-60% RH. Additionally, a line which marks approximately the 100% RH<sub>i</sub> in Figure 5 would help to see which observations could be potentially affected by clouds. All measurements strongly above 60% RH could be potentially clear sky observations again, because in clouds the humidity is diminished by the diffusional growth of ice particles to the thermodynamic/dynamical equilibrium around 100% or slightly above.

As previously mentioned in our response, to distinguish the effect of temperature and water vapor on RH/RH<sub>i</sub> values, we computed the water vapor mixing ratio (WV) for each profile between September 2013 to July 2016. We found a mean upper tropospheric (10-13km) WV of 121 ppmv over this period. We use this threshold in Figure 5 of the revised manuscript to add 2 lines indicating the mean RH values for “hydrated profiles” with WV mixing ratios > 121 ppmv (RH ~45%) and “strongly hydrated” profiles for WV mixing ratios > 2.5x121ppmv (RH ~56%) with a red line. We think this is a better alternative to showing the 100% RH<sub>i</sub> as we only include the hydration effect on the mean RH values rather than the temperature effect. These lines help the justification of the threshold of RH=50% to characterize hydrated air masses (the sensitivity of this threshold is discussed in our response to reviewer 3). As you suggested, we have added some discussion in the revised manuscript on the possible presence of clouds for RH between 50&60%.

- Page 6, lines 200-220: The process of mixing typically depends on the dynamics (e.g. wind shears, wave breaking etc.) but also on time as you wrote. I suggest to include a plot or at least some numbers how long the air masses stayed in the upper troposphere after the convective uplift and the time of the measurement. This would give some indication if the duration is on the typical timescale of mixing.

We have computed the residence time in the middle troposphere (RTMT, 5-10km) using the FLEXPART backtrajectories and the evolution of RTMT is shown on Figure 10 of the revised manuscript in addition to the evolution of RTLT. As indicated previously, the sum of RTLT+RTMT corresponds to the total residence time in the troposphere between 0 and 10km. A discussion has been added in section 3.4.2 of the revised manuscript on the influence of the middle troposphere into the hydrated profiles.

Figure 7 shows the summer averaged map of RTLT (filled contours) and DCCO (contours) for backtrajectories calculated over 48h (row 1), 96h (row 2), 120h (row 3) and 168h (row 4) from profiles with a mean RH in the 10-13km altitude range higher than 50%. RTLT from 46h backtrajectories is mostly located in the vicinity of Réunion Island, and the Northeast of Madagascar. The 96-hour RTLT pattern is significantly different and spreads over the East of the North of Madagascar for 2015 and 2016, and also West of Madagascar in 2014. The pattern of 120-hour and 168-hour RTLT is roughly similar to the 96-hour RTLT, except that RTLT is

more spread over the Northeastern and Western regions of Madagascar. It means that most of the humid air masses reaching the 10-13km layer above Reunion island were embedded in convective clouds and left the lower troposphere within 96 hours. The spread in the RTLT product from 96 hours to 168 hours backward in time is the result of horizontal atmospheric transport in the lower troposphere. Therefore, we can estimate an average time of transport between Reunion island and the main convective sources to be 96 hours. We added those comments in section 3.2 of the revised manuscript.

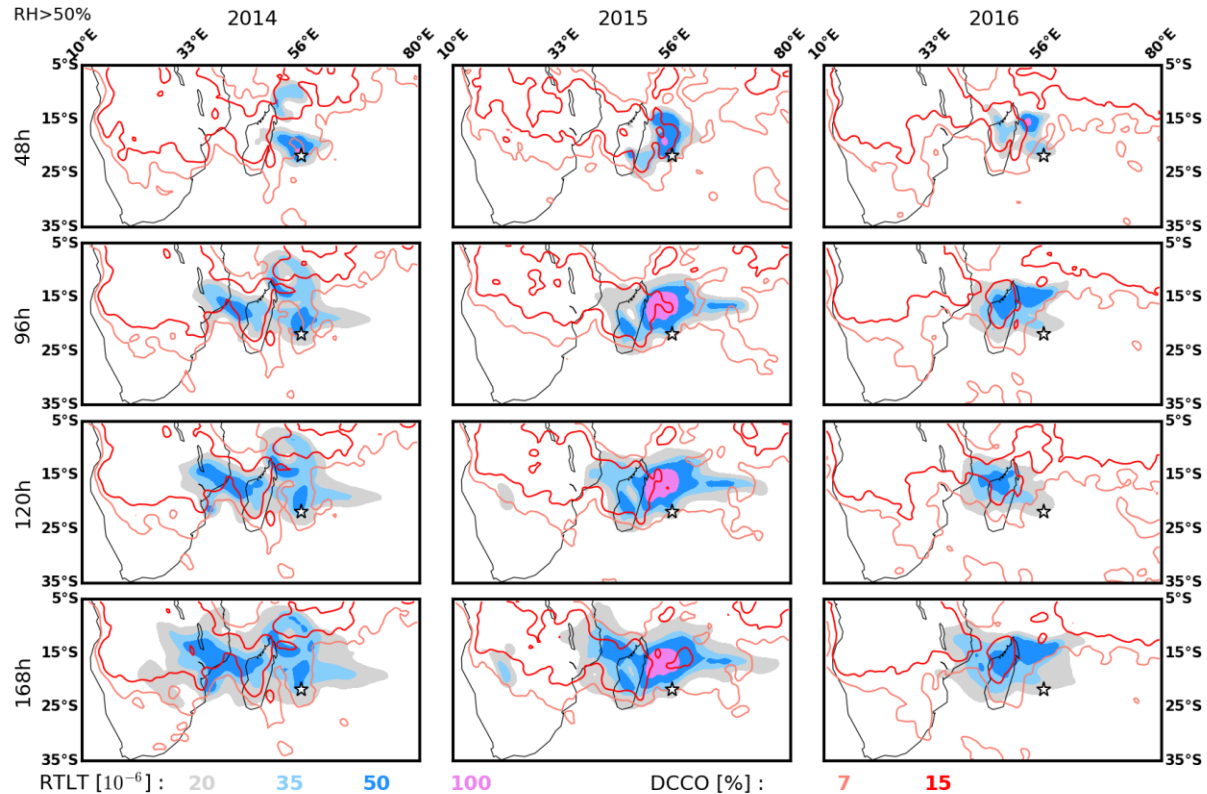

**Figure 7 : Average RTLT (filled contours) and DCCO (contours) from profiles in summer with a mean RH > 50% in the 10-13km altitude layer, calculated with 48h (row 1), 96h (row 2), 120h (row 3) and 168h (row 4) backtrajectories.**

• Page 8, lines 252-253: I agree that the signature in the RH profiles around 11km could be potentially from the cyclone. But I'm also sure that there is also a cloud layer at 11 km altitude. Because the RH<sub>i</sub> is around 100% (RH eq. 60%) and the decrease in the humidity below the layer is slower than above the layer which indicates the hydration effect due to sedimented ice crystals. Here, I would suggest a bit more discussion about that.

**We agree with this and have added a discussion about this point in section 3.4.1 of the revised manuscript.**

• Page 9, lines 299-305 in combination with Figure 10: There are many peaks in RH which do not correspond to any signature in both trajectory products (e.g. around 01/Dec 2015, End of Jan 2015, beginning of summer 2015/2016 and many more). It would be good, if there would be more discussion in the text to explain those peaks and possible reasons (see also my main comment above).

**See our answers to your main comment**

• Page 9: In Section 3.4.3 the geographical origin of convection is discussed with the help of the product of DCCO and RTLT. In text the discussion is linked to the respective cyclones. It would really be helpful to follow the

discussion, if the names or at least the letters of the occurring cyclones (A-F) are written in each subplot of Figure 11. For example for March 2015 G and H or the full names of the cyclones.

**Figure 11 has been modified in the revised manuscript to include the names of tropical cyclones.**

### **Technical comments/suggestions:**

**We took all technical comments into account.**

- Page 4, line 123: period of "the" study
- Page 4, line 126: to our treatment "of" convective
- Page 5, lines 141-142: "Residence times are computed using the model gridded output domain ( $1^\circ \times 1^\circ$  grid cells) values combining the results of the 3-hourly runs to provide a daily estimate of the source regions for air particles." This sentence is difficult to understand. Can you please rephrase.
- Page 5, line 146 and 147: "low" should be "lower"?
- Page 8, line 269: Skip the word "was"
- Page 9, lines 288-290: Sentence needs to be rephrased " estimated by correspon-des "
- Please check the capitalization of the word Figure in text (e.g. page 8, line 273). It should be consistent throughout the manuscript.
- Figure 8: It would be good, if you could include the location of Reunion island in the maps.

### **References**

- Bodeker, G. E., Bojinski, S., Cimini, D., Dirksen, R. J., Haeffelin, M., Hannigan, J. W., Hurst, D., Madonna, F., Maturilli, M., Mikalsen, A. C., Philipona, R., Reale, T., Seidel, D. J., Tan, D. G. H., Thorne, P. W., Vömel, H., and Wang, J.: Reference upper-air observations for climate: From concept to reality, *B. Am. Meteorol. Soc.*, 97, 123–135, <https://doi.org/10.1175/BAMS-D-14-00072.1>, 2015.
- Folkins, I., Kelly, K. K., and Weinstock, E.M.: A simple explanation for the increase in relative humidity between 11 and 14km in the tropics., *J. Geophys. Res.*, 4736, doi:10.1029/2002JD002185, 2002.
- Hyland, R. W. and Wexler, A.: Formulations for the thermodynamic properties of the saturated phases of H<sub>2</sub>O from 173.15 K to 473.15 K, *ASHRAE Trans.*, 89, 500-519, 1983
- Minnis, P., Yost, C. R., Sun-Mack, S., and Chen, Y.: Estimating the top altitude of optically thick ice clouds from thermal infrared satellite observations using CALIPSO data, *Geophys. Res. Lett.*, 35, 1-6, 2008.
- Schumacher, C., Stevenson, S. N., and Williams, C. R.: Vertical motions of the tropical convective cloud spectrum over Darwin, Australia, *Q. J. Roy. Meteor. Soc.*, 141, 2277–2288, doi:10.1002/qj.2520, 2015.
- Vömel, H., Barnes, J. E., Forno, R. N., Fujiwara, M., Hasebe, F., Iwasaki, S., Kivi, R., Komala, N., Kyrö, E., Leblanc, T., Morel, B., Ogino, S. Y., Read, W. G., Ryan, S. C., Saraspriya, S., Selkirk, H., Shiotani, M., Canossa, J. V., and Whiteman, D. N.: Validation of Aura Microwave Limb Sounder water vapor by balloonborne Cryogenic Frost point Hygrometer measurements, *J. Geophys. Res.-Atmos.*, 112, D24S37, doi:10.1029/2007JD008698, 2007.

**Vömel, H., Naebert, T., Dirksen, R., and Sommer, M.: An update on the uncertainties of water vapor measurements using cryogenic frost point hygrometers, *Atmos. Meas. Tech.*, 9, 3755–3768, <https://doi.org/10.5194/amt-9-3755-2016>, 2016.**

**Young, A. H., J. J. Bates, and J. A. Curry (2013), Application of cloud vertical structure from CloudSat to investigate MODIS-derived cloud properties of cirriform, anvil, and deep convective clouds, *J. Geophys. Res. Atmos.*, 118, 4689–4699, doi:10.1002/jgrd.50306.**
